# Supplementary material for: Boosting the interfacial hydrogen migration for efficient alkaline hydrogen evolution on Pt-based nanowires
Source: Royal Society of Chemistry journal article supplement (doi:10.1039/d2ta05156g), 2022-01-01
Supplement: d2ta05156g1.pdf [file d2ta05156g1.pdf]

1 **Boosting the Interfacial Hydrogen Migration for Efficient Alkaline Hydrogen**  
2 **Evolution on Pt-Based Nanowires**

3

4 Wenchuan Lai,<sup>1,†</sup> Penglin Yu,<sup>1,†</sup> Lei Gao,<sup>1</sup> Zhilong Yang,<sup>1</sup> Bingling He,<sup>2,\*</sup> and Hongwen  
5 Huang<sup>1,3\*</sup>

6

7 <sup>1</sup> College of Materials Science and Engineering, Hunan University, Changsha, Hunan 410082, P.  
8 R. China.

9 <sup>2</sup> College of Physics and Electronic Engineering, Xinxiang University, Xinxiang, Henan 453003,  
10 P. R. China

11 <sup>3</sup> Shenzhen Research Institute of Hunan University, Shenzhen, Guangdong 518055, P. R. China

12

13 <sup>†</sup>These authors contributed equally to this work.

14

15 Correspondence and requests for materials should be addressed to B.H. (hbl626@126.com); H.H.  
16 (huanghw@hnu.edu.cn).

17

18

19 **Abstract**

20 The alkaline hydrogen evolution reaction (HER) on Pt-based catalysts is largely retarded by  
21 insufficient supply of dissociated hydrogen (\*H) on Pt sites. Hydrogen spillover offers a  
22 promising solution to deliver the reactive \*H, however, the hydrogen migration process generally  
23 suffers from thermodynamic/kinetic obstacles. Herein, we demonstrate that hydrogen spillover  
24 on binary PtNi nanowires can be thermodynamically and kinetically boosted by P-doping,  
25 resulting in the substantially improved alkaline HER. A combination of experimental and  
26 theoretical investigations suggests that the dual roles of incorporated P heteroatoms in facilitating  
27 the hydrogen spillover, involving the increased \*H coverage *via* promoting the water  
28 dissociation, and the accelerated hydrogen migration across Pt-Ni interface to Pt sites *via*  
29 lowering kinetic barrier. Benefiting from the enhanced \*H supply on Pt sites, the P-doped PtNi  
30 nanowires expressed an impressive alkaline HER performance ( $\eta_{10}$  12 mV, mass activity 5.8 A  
31  $\text{mg}^{-1}_{\text{Pt}}$  at 70 mV), outperforming most of state-of-the-art HER electrocatalysts.

32

33 **Keywords:** Hydrogen evolution reaction; interfacial hydrogen migration; Pt-based nanowires; P-  
34 doping; thermodynamics and kinetics

35

## 36 Introduction

37 Green hydrogen production from electrocatalytic water splitting has been considered as a  
38 promising method for effective transformation and utilization of sustainable energy sources so as  
39 to alleviate the global environmental problem and energy crisis.<sup>1, 2</sup> Rational design of robust  
40 electrocatalyst undertakes the central role on the route to deploying hydrogen evolution reaction  
41 (HER) technology.<sup>3, 4</sup> By far, Pt is supposed to be the top HER electrocatalyst with good intrinsic  
42 activity originated from its appropriate hydrogen adsorption Gibbs free energy ( $\Delta G_H$ ), according  
43 to the Sabatier principle.<sup>5</sup> Unfortunately in alkaline medium that is beneficial to anode protection  
44 during water electrolysis, the HER activity of Pt is 2~3 orders of magnitude lower than that in  
45 acid.<sup>6</sup> Given that the shortage of reactive protons in alkaline electrolyte and sluggish water  
46 dissociation ( $* + H_2O + e^- \rightleftharpoons *H + OH^-$ , Volmer step) on Pt, the insufficient supply of  
47 dissociated hydrogen (\*H) to Pt sites severely retards the alkaline HER kinetics.<sup>7</sup>

48 To address the issue, incorporating another promoter component, like the transition metal  
49 (TM, e.g., Ni, Fe, Co, etc.) or their oxides/hydroxides, into Pt matrix, can significantly boost the  
50 Volmer step in alkaline medium and increase \*H for latter Heyrovsky/Tafel step.<sup>8, 9</sup> In the  
51 meantime, the alloying/hybridization strategy also enables to lower the usage of noble Pt  
52 material to reduce the catalyst cost. Despite the advances from such a binary design, the  
53 thorough consideration on \*H delivery is still inadequate. Specifically, it is previously assumed  
54 that water dissociation reactions take place at Pt-TM interface, resulting in \*OH and \*H species  
55 binding with TM and Pt sites, respectively. However, in most practical cases, the interfacial  
56 phase should account for small percentage of bulk phase, for instance in the pioneering work of  
57 Markovic *et al.*, the lateral dimension of segregated Ni clusters deposited on Pt matrix ranges  
58 from 8 to 10 nm.<sup>8</sup> It is therefore hinted that in a phase-separated Pt-TM binary system, the water  
59 dissociation should mainly occur in inside region of TM phase, rather than the interfacial sites.<sup>2,</sup>  
60 <sup>10</sup> In this case, the formed \*H have to be transferred from TM phase to Pt phase in the first place,  
61 followed by the hydrogen combination and desorption on Pt sites.<sup>11-13</sup>

62 In this regard, hydrogen spillover is recently focused that offers new insights to enhance the

63 \*H supply and HER activity of binary catalysts.<sup>12, 14-17</sup> The hydrogen spillover typically proceeds  
64 through hydrogen migration from H-enriched sites (also strong \*H adsorption sites) to H-  
65 deficient sites (also weak \*H adsorption sites), similar to the case of abovementioned binary  
66 system.<sup>15, 18</sup> Interestingly, due to the moderate  $\Delta G_{\text{H}}$  on Pt sites close to thermo-neutral point, Pt  
67 can act as \*H donating sites or accepting sites, depending on the \*H binding strength of  
68 secondary component.<sup>10, 13, 19-21</sup> Although hydrogen spillover is first discovered in acidic HER  
69 system, up-to-date researches also witness the spillover behavior in alkaline HER, which is  
70 meaningful to strengthen the \*H supply for Pt-based binary catalyst in alkali.<sup>10, 12, 22, 23</sup> It must be  
71 pointed out that, because hydrogen spillover from strong to weak \*H sites is intrinsically  
72 unfavorable in thermodynamics, it will inevitably require the adequate driving force.<sup>18</sup> On the  
73 other hand, the hydrogen spillover across the interfaces, has to overcome the high migration  
74 kinetic barriers.<sup>15</sup> These two challenges could give rise to the less-motivated or even frustrated  
75 hydrogen spillover on binary catalysts under HER conditions. Consequently, the manipulation on  
76 interfacial migration of \*H is of particular importance to optimize the catalytic activity. To this  
77 end, some previous works showcase the potential impacts of catalyst structure (like particle  
78 size<sup>24</sup> or crystalline phase<sup>10</sup>) and ligand modification<sup>18</sup>, on hydrogen spillover process. However,  
79 the strategy to thermodynamically and kinetically accelerate interfacial hydrogen migration, is  
80 still insufficient to date for Pt-based binary catalysts, hindering the further improvement of  
81 alkaline HER activity.

82 Doping with metalloids has proved to be an efficient strategy to improve the  
83 intrinsic activity of electrocatalysts, where phosphorus (P) with abundant valence electrons  
84 shows great potential on reshaping the electronic structure and optimizing the adsorption energy  
85 of key reaction species.<sup>25, 26</sup> Herein, we demonstrated that P-doping can boost interfacial  
86 hydrogen spillover on Pt-based binary catalyst so as to increase \*H supply on Pt sites for  
87 efficient alkaline HER. Through a wet-chemical method, we have synthesized ultrafine binary  
88 PtNi nanowires (PtNi NWs), and then realized P incorporation by vapor phase annealing method.  
89 Theoretical simulations together with experimental evidences confirmed the effect of P

90 heteroatoms on optimizing electronic structures of PtNi catalyst, leading to the improved  
91 thermodynamics and kinetics driving force for hydrogen migration, from Ni sites to Pt sites,  
92 under HER conditions. As consequences of the enhanced \*H supply, the P-doped nanowires  
93 (PtNiP NWs) delivered an impressive alkaline HER performance, markedly outperforming the  
94 bench mark Pt/C and most of state-of-the-art electrocatalysts. This work demonstrates the  
95 availability of hydrogen spillover in promoting alkaline HER, and can enlighten the reasonable  
96 design of catalysts by manipulating \*H delivery.

97

## 98 **Results and discussion**

### 99 *Synthesis and structural characterizations of P-doped PtNi NWs*

100 In a typical synthesis displayed as [Fig. 1a](#), ultrafine PtNi NWs were firstly prepared through  
101 wet-chemical route from Pt and Ni precursors (see Experimental methods for details). [Fig. 1b](#)  
102 presents the low-magnification transmission electron microscopy (TEM) image of as-prepared  
103 PtNi NWs, where ultrafine nanowires with shish-kebab-like features can be clearly observed.  
104 The statistical analysis manifests an average length at around 60 nm for PtNi NWs, and an  
105 average diameter of 6.5 nm in protuberance position ([Fig. 1b](#) inset). In the following P-doping  
106 process, the as-prepared PtNi NWs were loaded on carbon supports in advance to avoid the  
107 aggregation, and then heated at 250 °C for 2 h with  $\text{NaH}_2\text{PO}_4 \cdot \text{H}_2\text{O}$  as phosphorus source. The P-  
108 doped nanowires (PtNiP NWs) were finally labeled as PtNiP-0.03 NWs, PtNiP-0.11 NWs and  
109 PtNiP-0.81 NWs respectively, based on the P/Pt atomic ratio determined by inductively coupled  
110 plasma-atomic emission spectroscopy (ICP-AES) shown in [Table S1](#). It should be noted that the  
111 as-prepared PtNi NWs hold a Ni/Pt atomic ratio of 1.89, while the heat treatment even in the  
112 absence of phosphorus source, still lessens the Ni/Pt ratio (e.g., 1.11 for PtNi NWs). The  
113 difference hints that thermal treatment caused Ni emigration and loss, while meantime some Ni  
114 segregations could exist in PtNiP NWs.<sup>27, 28</sup>

115

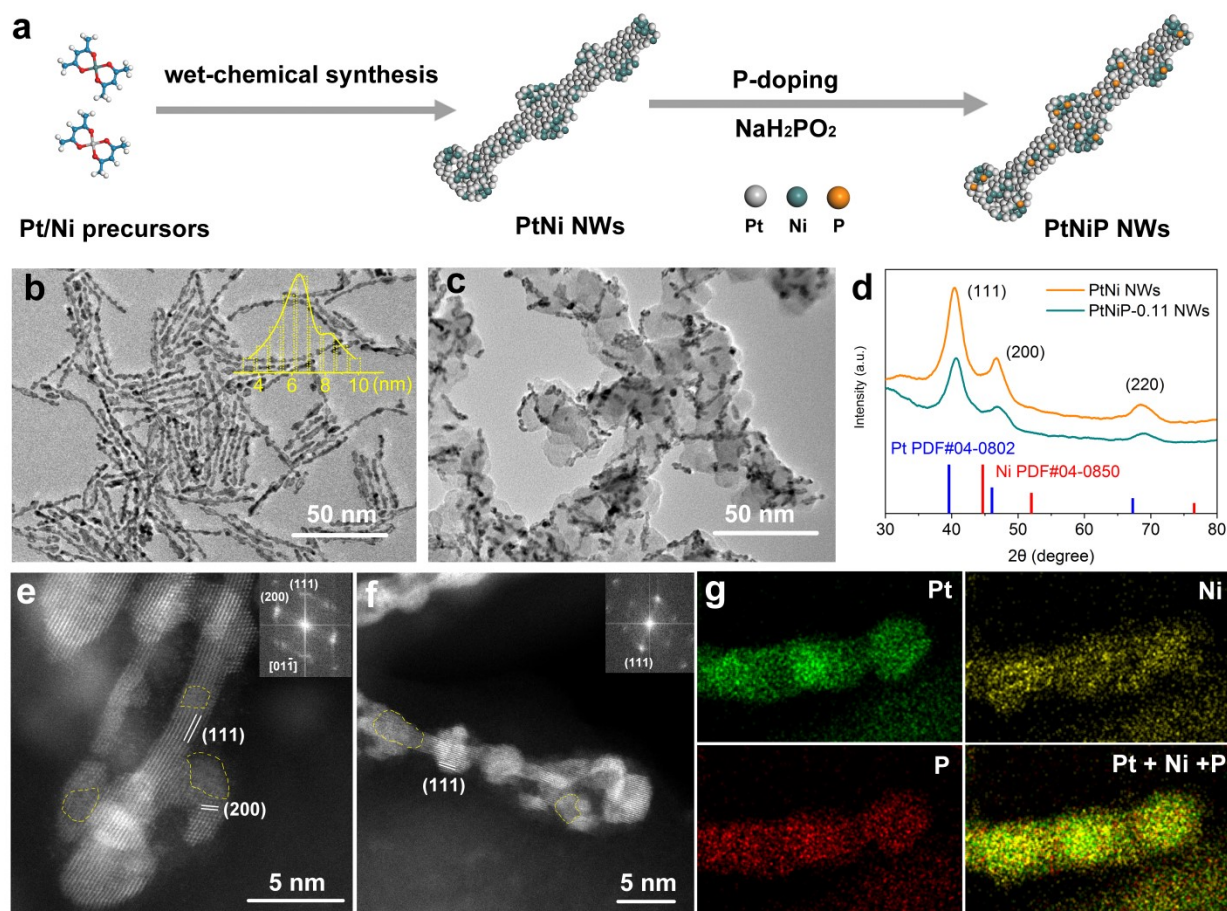

116

117 **Fig. 1** Structural characterizations of as-prepared PtNi NWs and PtNiP NWs. (a) Preparation  
 118 method of PtNiP NWs comprised of wet-chemical synthesis and P-doping step. (b) Low-  
 119 magnification TEM image of PtNi NWs before P-doping. The inset is the diameter distribution  
 120 of nanowires (average diameter at around 6.5 nm). (c) Low-magnification TEM image of PtNiP-  
 121 0.11 NWs after P-doping. (d) XRD patterns of PtNi NWs and PtNiP-0.11 NWs. (e) and (f)  
 122 Atomic-resolution aberration-corrected HAADF-STEM images of PtNiP-0.11 NWs. The insets  
 123 correspond to the FFT patterns. The regions encircled by yellow dashed lines correspond to  
 124 amorphous segregational Ni clusters. (g) EDS mapping along a PtNiP-0.11 NWs including Pt, Ni,  
 125 P elements and overlapping.

126

127 [Fig. 1c](#), [S1](#) and [S2](#) exhibit the low-magnification images of several PtNiP NWs, in which  
 128 the nanowires structures with some protuberances are basically remained in PtNiP-0.03 NWs and

129 PtNiP-0.11 NWs, with slight decrease in axial length. Note that P-doping under high temperature  
130 also created some hollow features inside the nanowires beneficial to the exposure of active sites.  
131 By contrast, PtNiP-0.81 NWs has mostly been broken into small particles, probably arisen from  
132 the too drastic phosphorization reaction. The X-ray diffraction (XRD) pattern of PtNi NWs in  
133 Fig. 1d shows the typical face-centered cubic (*fcc*) structural features of PtNi nanowires with  
134 some right shift compared to pure Pt, which is caused by the incorporation of Ni atoms. After P-  
135 doping, the XRD characteristic is slightly changed for PtNiP NWs (Fig. S3), indicating no  
136 drastic transformation in crystalline structure after mild P-doping and the formation of some  
137 amorphous structures probably associated with segregational Ni cluster. This further echoes with  
138 the XRD pattern of excessively P-doped PtNiP-0.81 NWs where much more amorphous  
139 structures can be observed. Moreover, high-angle annular dark-field scanning transmission  
140 electron microscopy (HAADF-STEM) was collected to determine the microstructure and atomic  
141 packing of PtNiP-0.11 NWs. The nanowire characteristic with some protuberances and hollow  
142 positions was further confirmed (Fig. S4). By measuring the lattice parameters, we distinguish  
143 the fringes matching with (111) and (200) planes of typical *fcc* PtNi alloys, in line with the fast  
144 Fourier transform (FFT) pattern displayed in the insets (Fig. 1e-1f).<sup>29, 30</sup> Meanwhile, we also  
145 notice some amorphous region in atomic-resolution HAADF-STEM images (encircled by yellow  
146 dashed lines in Fig. 1e-1f), which further confirms the existence of amorphous segregational Ni  
147 clusters, in line with the hints from ICP-AES and XRD.

148

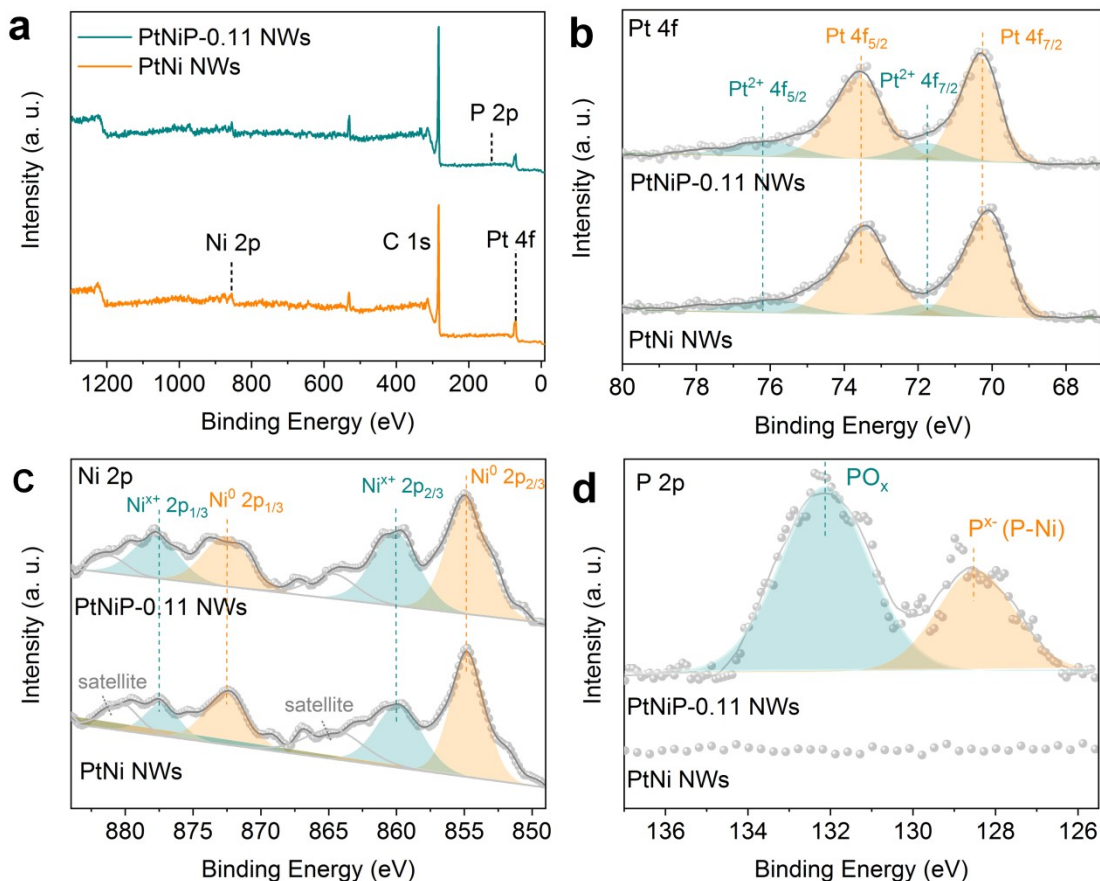

149

150 **Fig. 2** XPS spectra comparison between PtNi NWs and PtNiP-0.11 NWs. (a) Survey spectra. (b)-  
 151 (d) Pt 4f, Ni 2p, and P 2p spectra, respectively.

152

153 Chemical composition was then analyzed based on energy dispersive spectroscopy (EDS)  
 154 elemental mapping profile. As Fig. 1g and S5 reveal, the doped P element homogeneously  
 155 distribute throughout the whole PtNiP-0.11 NWs. On the other hand, X-ray photoelectron  
 156 spectroscopy (XPS) was collected to monitor the evolution in chemical environment of nanowire  
 157 after P-doping (Fig. 2). To offset the effect of high temperature, here we adopt the PtNi NWs  
 158 after heat treatment under N<sub>2</sub> atmosphere, instead of as-prepared nanowires, as a contrast sample  
 159 (TEM shown in Fig. S6). The Pt 4f and Ni 2p spectra typically contain metallic and oxidized  
 160 states for both PtNi NWs and PtNiP-0.11 NWs (Fig. 2b and 2c), where oxidized Ni could  
 161 appears as NiO or Ni(OH)<sub>2</sub> species. Notably, the Ni<sup>x+</sup>/Ni<sup>0</sup> and Pt<sup>2+</sup>/Pt<sup>0</sup> ratio increase from 0.55 to  
 162 0.74 and from 0.18 to 0.23 respectively, which could be traced to the charge transfer interaction



163 between metal and P atoms. Besides, from spectrum in Fig. 2d, P element mainly appears as P<sup>x-</sup>  
164 (mainly bonding with Ni, 128.6 eV) and PO<sub>x</sub> (result of surface oxidation by air, 128.6 eV)  
165 state,<sup>31-33</sup> while the evident negative shift of peak P<sup>x-</sup> relative to pure P (130.4 eV) again implies  
166 the electron transfer from metal to P atoms.<sup>34</sup> Therefore, all these results support the uniform P-  
167 doping on PtNiP-0.11 NWs without markedly affecting nanowire morphologies, and the  
168 electronic structure could be modulated meantime enabling the alteration of catalytic behaviors.

169

### 170 *Evaluation of alkaline HER performance*

171 To investigate the P-doping effect on the catalytic performance, we then evaluated the HER  
172 performance by a three-electrode system in N<sub>2</sub>-saturated 1 M KOH. As references, PtNi NWs  
173 (after heat treatment under N<sub>2</sub> atmosphere without phosphorus source) and benchmark  
174 commercial Pt/C were also studied. The respective current density was calculated based on the  
175 geometric area of utilized glassy carbon rotating disk electrode (GC-RDE, 0.196 cm<sup>2</sup>). The linear  
176 sweep voltammetry (LSV) polarization curves in Fig. 3a designate the relatively inferior activity  
177 of Pt/C in alkaline HER with overpotential at 10 mA cm<sup>-2</sup> ( $\eta_{10}$ ) high as 67 mV (Fig. S7). In  
178 contrast, the PtNi NWs behave the ameliorative catalytic performance ( $\eta_{10}$ , 24 mV), owing to the  
179 Ni coupling and unique ultrafine one-dimensional nanowire features with high exposure of active  
180 sites. It is found that the PtNi NWs exhibits slightly higher HER activity than as-prepared PtNi  
181 NWs (without undergoing the heat treatment), which could be traced the morphologic evolution  
182 induced by heat treatment like Ni segregation (Fig. S8). Remarkably, the moderate P-doping  
183 further improves the alkaline HER performance by lowering the overpotentials (PtNiP-0.03 NWs  
184 and PtNiP-0.11 NWs), while the excessive P-doping causes the undesirable performance  
185 degeneration on account of the structural fragmentation (PtNiP-0.81 NWs). Among P-doped  
186 counterparts, PtNiP-0.11 NWs delivers the most excellent catalytic performance with lowest  
187 overpotential of only 12 mV at 10 mA cm<sup>-2</sup> and 67 mV at 100 mA cm<sup>-2</sup>, hinting the significant  
188 promotion effect of well-controlled P-doping on alkaline HER activity.

189

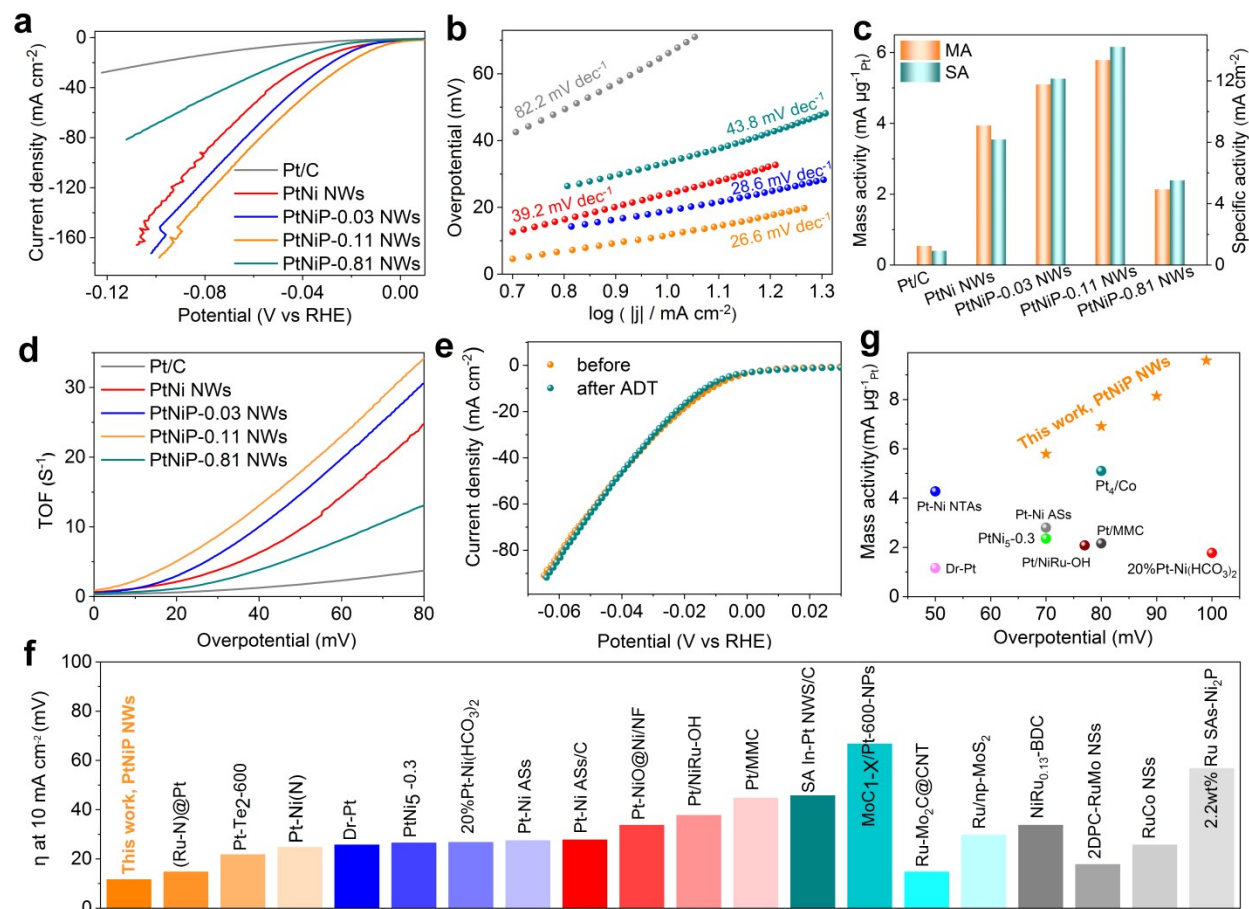

190  
 191 **Fig. 3** Electrocatalytic HER performance of Pt/C, PtNi NWs and P-doped counterparts in N<sub>2</sub>-  
 192 saturated 1 M KOH electrolyte. (a) Polarization LSV curves with sweep rate of 5 mV s<sup>-1</sup>. (b) The  
 193 fitted Tafel plots. (c) Mass activity and specific activity at overpotentials of 70 mV. (d) TOF  
 194 curves derived from polarization curves. (e) LSV curves of PtNiP-0.11 NWs before and after  
 195 ADT *via* CV scanning between -0.1 V and 0.1 V vs RHE for 10000 cycles. (f) HER  
 196 overpotentials contrast between PtNiP-0.11 NWs in this work and other state-of-the-art Pt/Ru-  
 197 based catalysts in literatures. (g) Mass activity comparison between PtNiP-0.11 NWs in this  
 198 work and other state-of-the-art Pt-based catalysts at corresponding overpotentials.

199

200 By fitting the polarization curves, Fig. 3b presents the Tafel plots for analyzing the HER  
 201 kinetics. In line with the frustrated catalytic behavior, the Tafel slope of Pt/C is high as 82.2 mV  
 202 dec<sup>-1</sup>, suggesting the sluggish water dissociation (Volmer) step as rate-determining step (RDS) in  
 203 alkaline medium. The Tafel slope of PtNi NWs equals to the lower 39.2 mV dec<sup>-1</sup>, which

204 demonstrates that RDS switches from Volmer step to electrochemical desorption step and Ni  
205 introduction accelerates water dissociation kinetics.<sup>35</sup> The P-doping further lessens Tafel to 26.6  
206 mV dec<sup>-1</sup> for PtNiP-0.11 NWs, in which P atoms can promote both Volmer and desorption step.  
207 The extrapolation of Tafel plots proclaims the largest exchange current density at 3.51 mA cm<sup>-2</sup>,  
208 corresponding to its optimal intrinsic activity (Fig. S9). Moreover, it is shown by Fig. 3c, S10  
209 and S11 that PtNiP-0.11 NWs has the highest mass activity (5.8 A mg<sup>-1</sup><sub>Pt</sub> at 70 mV) and specific  
210 activity (14.2 mA cm<sup>-2</sup> at 70 mV) with notable improvement relative to un-doped counterparts.  
211 The turnover frequency (TOF) is also calculated to designate the intrinsic activity of diverse  
212 catalysts (Fig. 3d), where PtNiP-0.11 NWs holds the highest TOF of 28.6 s<sup>-1</sup> at 70 mV, markedly  
213 outperforming the other electrocatalysts. On the other hand, catalyst stability was examined by  
214 accelerated durability test (ADT) *via* CV scan between -0.1 V and 0.1 V *vs* RHE for 10000  
215 cycles. No obvious current density decay in polarization curves can be found for PtNiP-0.11  
216 NWs after ADT (Fig. 3e). The TEM image after ADT also affirms the well-maintained nanowire  
217 structures of PtNiP-0.11 NWs (Fig. S12), in consistence with the reminded HER performance.  
218 Taking a broader view, the PtNiP-0.11 NWs behaves the outstanding catalytic HER activity in  
219 alkaline medium with small overpotential and high mass activity, overmatching the benchmark  
220 Pt/C and most of state-of-the-art noble-metal-based electrocatalysts (Fig. 3f-3g, Table S2-S3).  
221 These results together manifest the great potentials of PtNiP nanowires to replace and surpass  
222 Pt/C for practical HER application. In addition, we have further performed the etching treatment  
223 of PtNiP-0.11 NWs in acid to verify the function of Ni segregation on HER performance. It is  
224 clearly indicated by CV curves that acidic etching removed the surface Ni component to make Ni  
225 oxidation peak at around 1.4 V *vs* RHE, disappear (Fig. S13a). In consequence, the catalytic  
226 activity of PtNiP-0.11 NWs largely deteriorated, hinting the importance of Ni segregation on  
227 alkaline HER (Fig. S13b).

228

### 229 ***Mechanism insight into the boosted HER activity on P-doped PtNi NWs***

230 We then turn into the underlying mechanism that contributed to the notably enhanced

231 alkaline HER performance of PtNi NWs by P-doping. The density functional theory (DFT)  
232 calculations were performed to gain a fundamental insight into the electronic structure-reactivity  
233 correlation *via* using Vienna Ab-initio Simulation Package. As illustrated in Fig. S14, the  
234 calculation model for Pt/C catalyst was set as a slab that consisted of four atomic layers of ( $4 \times 4$ )  
235 supercell exposing *fcc* Pt (111) surface separated by 15 Å of vacuum space. The PtNi model was  
236 established by replacing several Pt atoms on Pt<sub>3</sub>Ni (111) surface with segregational Ni cluster  
237 according to structure analysis above, while the configuration optimization resulted in the P  
238 position between bridge site and *hcp* hollow site for PtNiP model.<sup>34</sup> Accordingly, charge density  
239 difference (CDD) was analyzed to inspect the alteration of electronic structures by P-doping.<sup>36, 37</sup>  
240 As shown in Fig. 4a, the charge density distribution on Pt and Ni near to P was evidently  
241 reshaped by P heteroatom to make the surface more polarized that may induce more active sites.  
242 This echoes with XPS analysis that charge transfer interaction occurs between P and Pt/Ni metals,  
243 and could enhance the catalytic activity. Meanwhile, the electronic structure alteration was also  
244 confirmed by projected density of states (PDOS) of Pt sites in models (Fig. 4b). The P  
245 incorporation lowers the *d*-band center from -2.02 eV for PtNi to -2.06 eV for PtNiP. Therefore,  
246 \*H adsorption is expected to be weakened so as to bring about a better HER activity on account  
247 of the slightly too strong \*H binding on Pt site.<sup>38</sup>

248

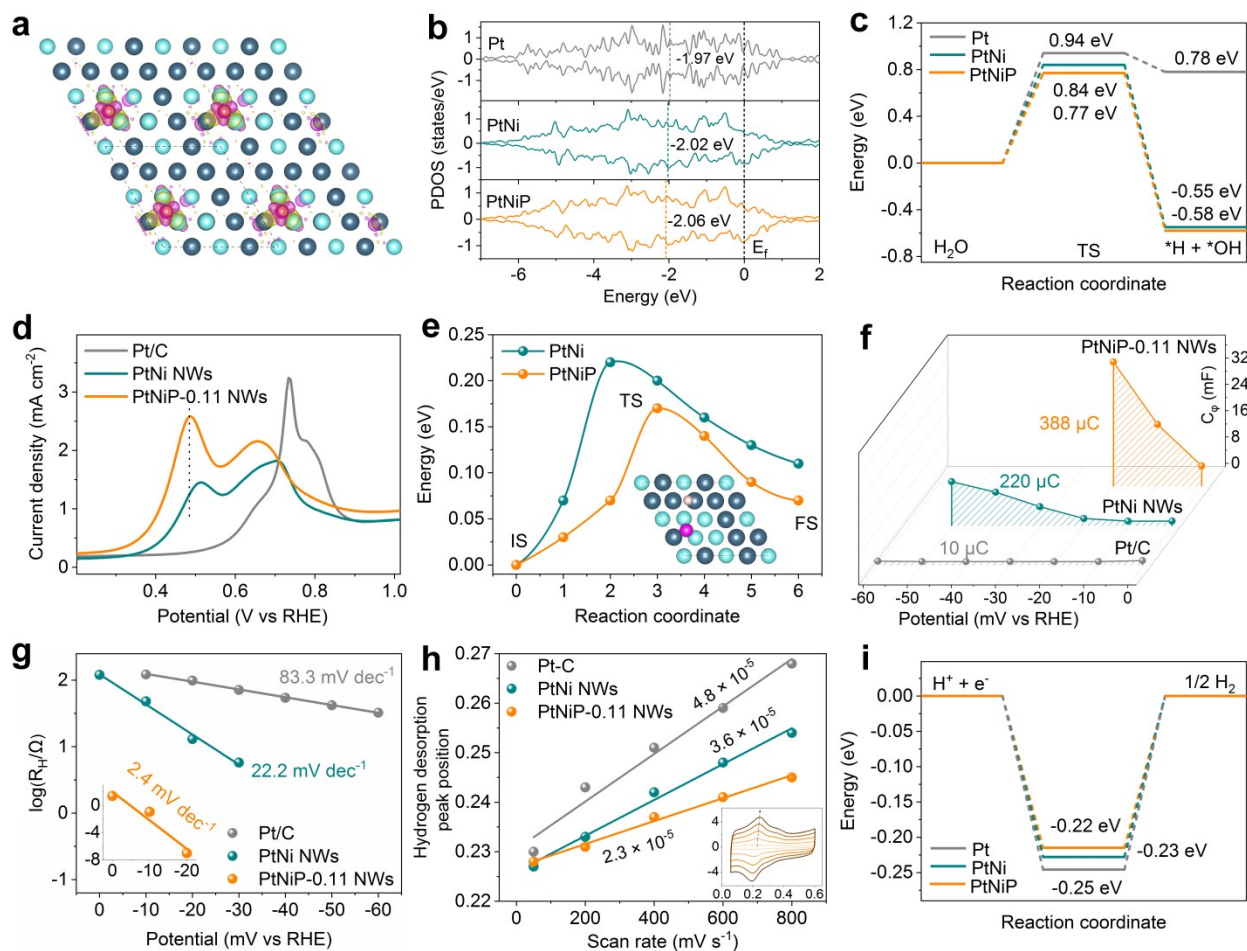

249

250 **Fig. 4** Mechanism insights to the outstanding HER performance of P-doped PtNi NWs. (a)  
 251 Charge density difference (CDD) analysis of PtNiP slab. (b) Calculated PDOS of Pt sites on Pt,  
 252 PtNi, and PtNiP slabs. The *d*-band center and  $E_F$  are indicated. (c) Water dissociation kinetics on  
 253 Pt, PtNi and PtNiP slabs. TS, transition state. (d) CO-stripping curves of Pt/C, PtNi NWs and  
 254 PtNiP-0.11 NWs. (e) Calculated energy barriers of hydrogen migration across Pt-Ni interface on  
 255 PtNi and PtNiP slabs. IS, initial state. FS, final state. The inset corresponds to TS configurations  
 256 of PtNiP during hydrogen spillover. (f) Hydrogen adsorption pseudo-capacitance ( $C_p$ ) as  
 257 function of potential and (g) EIS-derived Tafel plots for Pt/C, PtNi NWs and PtNiP-0.11 NWs  
 258 obtained from EIS fitting. (h) Linear fitting of hydrogen desorption peak position vs scan rate in  
 259 CV. The inset is the CV curves of PtNiP-0.11 NWs at varying scan rate from 50  $\text{mV s}^{-1}$  to 800  
 260  $\text{mV s}^{-1}$ , where *x*-axis and *y*-axis stand for potential (V vs RHE) and current density ( $\text{mA cm}^{-2}$ ),

261 respectively. (i) Hydrogen adsorption free energy diagram on Pt, PtNi and PtNiP slabs.

262

263 Next, the energy profiles were calculated by dividing overall HER into three consecutive  
264 steps, i.e., water dissociation, interfacial hydrogen spillover, and H<sub>2</sub> desorption.<sup>12</sup> The optimized  
265 configurations of HER key species and some transition states on slabs are given in Fig. S15-S21.  
266 In the first step, Fig. 4c indicates that water dissociation on Pt (111) surface is sluggish with  
267 quite high dissociation energy and reaction barrier. The barrier can be significantly lowered by  
268 Ni alloying, where dissociation reaction directly occurs on Ni sites (Fig. S16). This is in  
269 accordance with the previous conclusions that Ni benefits to water dissociation step on Pt-based  
270 binary catalysts.<sup>8</sup> In contrast, the P incorporation further reduces the energy barrier from 0.84 eV  
271 to 0.77 eV, indicating the promotion effect of the P-doping on water dissociation step for PtNi.  
272 This effect could be directed to the good oxophilicity of P atoms functioning as sites to anchor  
273 and stabilize OH<sup>-</sup> generated from water dissociation.<sup>39, 40</sup> In the optimized configuration, the  
274 preferential binding of OH<sup>-</sup> in P sites is witnessed as well on PtNiP slab (Fig. S17). The proposal  
275 is further supported by CO stripping curves (Fig. 4d and S22), where PtNiP holds the earliest  
276 onset potential for oxidative removal of CO and therefore the strongest OH<sup>-</sup> binding,<sup>35</sup> in  
277 comparison to PtNi catalyst. Besides, the more polarized and unsymmetrical structure of H<sub>2</sub>O  
278 molecule adsorbed on PtNiP catalyst again reflects the corresponding facile water dissociation  
279 kinetics (Fig. S23).

280 More importantly in the second step, the hydrogen spillover across the Pt-Ni interface to  
281 reach Pt site also requires to be promoted for better HER activity in phase-separated PtNi NWs  
282 (Fig. 1e-1f). This is reasonable because water dissociation occurs on Ni phase, and much  
283 stronger \*H adsorption on Ni site than that on Pt makes Pt the more suitable site for hydrogen  
284 combination and H<sub>2</sub> releasing. However, for general Pt-based hybrid catalysts, challenges  
285 confront the interfacial hydrogen migration that is not thermodynamically or kinetically  
286 favored.<sup>18</sup> To examine whether P-doping can boost this step, hydrogen migration kinetics  
287 difference is then compared between PtNi and PtNiP catalysts.<sup>41</sup> It is clearly demonstrated by Fig.



288 4e that PtNiP behaves a smaller energy barrier (0.17 eV) than that on PtNi slab (0.22 eV). In the  
289 presence of adsorbed OH<sup>-</sup> on slab from water dissociation, the migration barrier is relatively  
290 lower on PtNiP as well (Fig. S24). Therefore, P-doping is discovered to kinetically enhance the  
291 interfacial hydrogen spillover step on hybrid catalyst, which could arise from the optimization of  
292 electronic structures by P heteroatoms. According to the mechanistic investigations from Qu *et*  
293 *al.*, the accelerated migration kinetics on PtNiP could also be explained from aspects of work  
294 function ( $\Delta\Phi$ ).<sup>16</sup> As P-doping might preferentially occur on more active Ni (Fig. 2), the higher  
295  $\Delta\Phi$  of nickel phosphide in contrast to Ni would reduce  $\Delta\Phi$  difference between Ni and Pt,<sup>42-44</sup>  
296 leading to the decreased interfacial charge accumulation and promoted hydrogen migration  
297 across Pt-Ni interface.<sup>16, 45</sup>

298 On the other hand, experimentally, EIS measurements were performed to monitor the local  
299 \*H concentration under HER conditions so as to evaluate the thermodynamic driving force for  
300 hydrogen spillover on different catalysts (Fig. S25-S27). The potential-dependent Nyquist plots  
301 were fitted based on a typical double-parallel equivalent circuit model (Fig. S28 and Table S4).<sup>16</sup>  
302 The  $R_s$  represents the solution resistance, which is similar for all catalysts or applied potentials.  
303 The first parallel components ( $T$  and  $R_{CT}$ ) describe the charge-transfer kinetics. In most case, the  
304  $R_{CT}$  gradually decreases with overpotential rising, hinting the enhanced HER charge transfer  
305 kinetics by applying potentials. The second parallel components reflect the hydrogen adsorption  
306 behaviors comprised of hydrogen adsorption pseudo-capacitance ( $C_\phi$ ) and resistance ( $R_H$ ). As  
307 shown in Table S4,  $C_\phi$  gradually increases with applied potentials, and peaks (or slightly declines)  
308 after reaching saturated hydrogen adsorption, while  $R_H$  continuously decreases. Notably,  
309 integration of  $C_\phi$  vs potential within saturation range determines the hydrogen adsorption charge  
310 ( $Q_H$ ), corresponding to the local \*H coverage or concentration. It is exhibited by Fig. 4f that  
311 PtNiP-0.11 NWs possesses much higher \*H coverage ( $Q_H = 388 \mu\text{C}$ ) in comparison to that on  
312 PtNi NWs surface ( $Q_H = 200 \mu\text{C}$ ). In consequence, the higher concentration of \*H on P-doped  
313 nanowires caused by the enhanced water dissociation (Fig. 4c), can offer a larger thermodynamic  
314 driving force to motivate the interfacial hydrogen spillover process.<sup>18</sup> The EIS-derived Tafel

315 analysis by plotting  $\log R_H$  vs potential in Fig. 4g, also gives the markedly lower hydrogen-  
316 adsorption-resistance-involved Tafel slope of PtNiP (4.3 mV dec<sup>-1</sup>) than that of PtNi (22.2 mV  
317 dec<sup>-1</sup>), which describes the boosted hydrogen adsorption kinetics and more facile hydrogen  
318 spillover process on PtNiP-0.11 NWs. In addition, the sensitivity of hydrogen desorption peak  
319 position to scan rate during CV investigations can be used as a descriptor to reflect hydrogen  
320 desorption kinetics and evidence the occurrence of hydrogen spillover.<sup>15, 45</sup> As Fig. 4h and S29  
321 display, the hydrogen desorption peak shifts positively with scan rate increasing for all catalysts,  
322 among which PtNiP-0.11 NWs possesses lowest slope value. It is consequently indicated that the  
323 facile kinetics of hydrogen desorption on PtNiP-0.11 NWs can be linked to the strengthened  
324 hydrogen spillover behavior. Based on these theoretical and experimental results, we can  
325 conclude that P incorporation significantly promotes the interfacial hydrogen spillover behavior  
326 on phase-separated PtNi binary catalyst through improving both thermodynamic and kinetic  
327 driving force.

328 Finally, in the H<sub>2</sub> desorption step, the  $\Delta G_H$  was also calculated as a descriptor to evaluate  
329 the intrinsic HER activity.<sup>38</sup> It is expected that P-doping can further reduce \*H binding strength  
330 on Pt site to benefit the H<sub>2</sub> releasing. In this regard, Fig. 4i demonstrates PtNiP behaves the  
331 weakest hydrogen adsorption compared to Pt and PtNi catalyst, in accordance with its lowest *d*-  
332 band center in Fig. 4b and more facile H<sub>2</sub> releasing process to realize a better HER performance.  
333 On all accounts, as results of these mechanism insights, the P incorporation can modulate  
334 electronic structure of PtNi NWs, and significantly promote interfacial hydrogen spillover by  
335 increasing \*H coverage and reducing migration barrier. These result in the significantly  
336 enhanced \*H supply on Pt sites, which together with the optimized slightly  $\Delta G_H$ , ultimately  
337 improve overall HER activity.

338

## 339 **Conclusion**

340 In summary, we have demonstrated that P-doping can thermodynamically and kinetically boost  
341 the hydrogen migration to increase \*H supply on Pt sites for promotion of alkaline HER on Pt-



342 based binary catalyst. Through a vapor phase method, P heteroatoms were effectively  
343 incorporated to ultrafine PtNi NWs. XPS together with theoretical CDD analysis evidenced the  
344 charge transfer interaction between P and metal atoms on NWs, enabling the modulation of  
345 electronic structures and optimization of *d*-band center. As consequences of structure-reactivity  
346 sensitivity, water dissociation was firstly boosted on PtNiP NWs to produce more \*H, due to the  
347 increased H<sub>2</sub>O polarization, and OH<sup>-</sup> stabilization by P sites. In particular, theoretical simulations  
348 revealed the notably reduced kinetic barrier of hydrogen migration across Pt-Ni interface in the  
349 presence of P heteroatoms. Experimentally, electrochemical analysis confirmed the much higher  
350 \*H coverage on PtNiP NWs and corresponding smaller hydrogen absorption resistance, which  
351 reflected the higher thermodynamics driving force for interfacial hydrogen migration. As results  
352 of enhanced \*H supply on Pt sites from promoted hydrogen spillover, and the further  
353 optimized  $\Delta G_{\text{H}}$ , PtNiP NWs delivered an impressive alkaline HER activity surpassing most of  
354 state-of-the-art electrocatalysts, with  $\eta_{10}$  of 12 mV, Tafel slope of 26.6 mV dec<sup>-1</sup>, and mass  
355 activity of 5.8 A mg<sup>-1</sup><sub>Pt</sub> at 70 mV.

356

### 357 **Authorship Contributions**

358 **Wenchuan Lai:** Conceptualization, Methodology, Investigation, Formal analysis, Data Curation,  
359 Funding acquisition, Writing - original draft. **Penglin Yu:** Methodology, Investigation, Formal  
360 analysis. **Lei Gao:** Investigation. **Zhilong Yang:** Investigation. **Bingling He:** Conceptualization,  
361 Methodology, Resources. **Hongwen Huang:** Conceptualization, Methodology, Funding  
362 acquisition, Writing - review & editing, Supervision, Project administration.

363

### 364 **Declaration of Competing Interest**

365 The authors declare that they have no known competing financial interests or personal  
366 relationships that could have appeared to influence the work reported in this paper.

367

### 368 **Acknowledgements**

369 This work was supported by the National Key Research and Development Program of China (No.  
370 2021YFA1502000), NSFC (No. U2032149 and 22102052), the Science and Technology  
371 Innovation Program of Hunan Province (No. 2021RC3065 and 2021RC2053), Hunan Provincial  
372 Natural Science Foundation of China (No. 2020JJ2001), Shenzhen Science and Technology  
373 Program (No. JCYJ20210324120800002).

374

## 375 **References**

- 376 1. J. Zhu, L. Hu, P. Zhao, L. Y. S. Lee and K.-Y. Wong, *Chem. Rev.*, 2020, **120**, 851-918.
- 377 2. H. Wang, W. Fu, X. Yang, Z. Huang, J. Li, H. Zhang and Y. Wang, *J. Mater. Chem. A*,  
378 2020, **8**, 6926-6956.
- 379 3. S. Jiao, X. Fu, S. Wang and Y. Zhao, *Energy Environ. Sci.*, 2021, **14**, 1722-1770.
- 380 4. J. Guan, X. Bai and T. Tang, *Nano Res.*, 2022, **15**, 818-837.
- 381 5. L. Gao, Z. Yang, T. Sun, X. Tan, W. Lai, M. Li, J. Kim, Y.-F. Lu, S.-I. Choi, W. Zhang, C.  
382 Ma, S. C. Smith, Y.-G. Zhou and H. Huang, *Adv. Energy Mater.*, 2022, **12**, 2103943.
- 383 6. G. H. Gu, J. Lim, C. Wan, T. Cheng, H. Pu, S. Kim, J. Noh, C. Choi, J. Kim, W. A.  
384 Goddard, X. Duan and Y. Jung, *J. Am. Chem. Soc.*, 2021, **143**, 5355-5363.
- 385 7. Y. Z. Wang, M. Yang, Y.-M. Ding, N.-W. Li and L. Yu, *Adv. Funct. Mater.*, 2022, **32**,  
386 2108681.
- 387 8. R. Subbaraman, D. Tripkovic, D. Strmcnik, K.-C. Chang, M. Uchimura, P. Paulikas  
388 Arvydas, V. Stamenkovic and M. Markovic Nenad, *Science*, 2011, **334**, 1256-1260.
- 389 9. R. Subbaraman, D. Tripkovic, K.-C. Chang, D. Strmcnik, A. P. Paulikas, P. Hirunsit, M.  
390 Chan, J. Greeley, V. Stamenkovic and N. M. Markovic, *Nat. Mater.*, 2012, **11**, 550-557.
- 391 10. J. Ding, Y. Ji, Y. Li and G. Hong, *Nano Lett.*, 2021, **21**, 9381-9387.
- 392 11. C.-T. Dinh, A. Jain, F. P. G. de Arquer, P. De Luna, J. Li, N. Wang, X. Zheng, J. Cai, B. Z.  
393 Gregory, O. Voznyy, B. Zhang, M. Liu, D. Sinton, E. J. Crumlin and E. H. Sargent, *Nat.*  
394 *Energy*, 2019, **4**, 107-114.
- 395 12. H. Q. Fu, M. Zhou, P. F. Liu, P. Liu, H. Yin, K. Z. Sun, H. G. Yang, M. Al-Mamun, P. Hu,

- 396 H. F. Wang and H. Zhao, *J. Am. Chem. Soc.*, 2022, **144**, 6028-6039.
- 397 13. P. Li, G. Zhao, P. Cui, N. Cheng, M. Lao, X. Xu, S. X. Dou and W. Sun, *Nano Energy*,  
398 2021, **83**, 105850.
- 399 14. M. Xiong, Z. Gao and Y. Qin, *ACS Catal.*, 2021, **11**, 3159-3172.
- 400 15. J. Dai, Y. Zhu, Y. Chen, X. Wen, M. Long, X. Wu, Z. Hu, D. Guan, X. Wang, C. Zhou, Q.  
401 Lin, Y. Sun, S. C. Weng, H. Wang, W. Zhou and Z. Shao, *Nat Commun*, 2022, **13**, 1189.
- 402 16. J. Li, J. Hu, M. Zhang, W. Gou, S. Zhang, Z. Chen, Y. Qu and Y. Ma, *Nat Commun*, 2021,  
403 **12**, 3502.
- 404 17. T. Kim, S. B. Roy, S. Moon, S. Yoo, H. Choi, V. G. Parale, Y. Kim, J. Lee, S. C. Jun, K.  
405 Kang, S.-H. Chun, K. Kanamori and H.-H. Park, *ACS Nano*, 2022, **16**, 1625-1638.
- 406 18. J. Li, H.-X. Liu, W. Gou, M. Zhang, Z. Xia, S. Zhang, C.-R. Chang, Y. Ma and Y. Qu,  
407 *Energy Environ. Sci.*, 2019, **12**, 2298-2304.
- 408 19. J. Wei, S.-N. Qin, J.-L. Liu, X.-Y. Ruan, Z. Guan, H. Yan, D.-Y. Wei, H. Zhang, J. Cheng,  
409 H. Xu, Z.-Q. Tian and J.-F. Li, *Angew. Chem. Int. Ed.*, 2020, **59**, 10343-10347.
- 410 20. Y. Zhu, P. Tian, H. Jiang, J. Mu, L. Meng, X. Su, Y. Wang, Y. Lin, Y. Zhu, L. Song and C.  
411 Li, *CCS Chem.*, 2021, **3**, 2539-2547.
- 412 21. B. Jiang, L. Yang, F. Liao, M. Sheng, H. Zhao, H. Lin and M. Shao, *Nano Res.*, 2017, **10**,  
413 1749-1755.
- 414 22. E. V. Miu, J. R. McKone and G. Mpourmpakis, *J. Am. Chem. Soc.*, 2022, **144**, 6420-6433.
- 415 23. H. Tan, B. Tang, Y. Lu, Q. Ji, L. Lv, H. Duan, N. Li, Y. Wang, S. Feng, Z. Li, C. Wang, F.  
416 Hu, Z. Sun and W. Yan, *Nat. Commun.*, 2022, **13**, 2024.
- 417 24. J. Park, S. Lee, H. E. Kim, A. Cho, S. Kim, Y. Ye, J. W. Han, H. Lee, J. H. Jang and J. Lee,  
418 *Angew. Chem. Int. Ed.*, 2019, **58**, 16038-16042.
- 419 25. W. Tian, Y. Wang, W. Fu, J. Su, H. Zhang and Y. Wang, *J. Mater. Chem. A*, 2020, **8**,  
420 20463-20473.
- 421 26. H. Du, R.-M. Kong, X. Guo, F. Qu and J. Li, *Nanoscale*, 2018, **10**, 21617-21624.
- 422 27. L. Chen, L. Lu, H. Zhu, Y. Chen, Y. Huang, Y. Li and L. Wang, *Nat. Commun.*, 2017, **8**,

- 423 14136.
- 424 28. P. Wang, X. Zhang, J. Zhang, S. Wan, S. Guo, G. Lu, J. Yao and X. Huang, *Nat. Commun.*,  
425 2017, **8**, 14580.
- 426 29. L. Gao, T. Sun, X. Tan, M. Liu, F. Xue, B. Wang, J. Zhang, Y.-F. Lu, C. Ma, H. Tian, S.  
427 Yang, S. C. Smith and H. Huang, *Appl. Catal. B: Environ.*, 2022, **303**, 120918.
- 428 30. L. Gao, X. Li, Z. Yao, H. Bai, Y. Lu, C. Ma, S. Lu, Z. Peng, J. Yang, A. Pan and H. Huang,  
429 *J. Am. Chem. Soc.*, 2019, **141**, 18083-18090.
- 430 31. L. Li, T. Zhang, J. Yan, X. Cai and S. Liu, *Small*, 2017, **13**, 1700441.
- 431 32. B. Ma, Z. Yang, Y. Chen and Z. Yuan, *Nano Res.*, 2019, **12**, 375-380.
- 432 33. J. Liu, Z. Wang, J. Li, L. Cao, Z. Lu and D. Zhu, *Small*, 2020, **16**, 1905738.
- 433 34. Y. Zhao, X. Wang, G. Cheng and W. Luo, *ACS Catal.*, 2020, **10**, 11751-11757.
- 434 35. T. Tang, L. Ding, Z.-C. Yao, H.-R. Pan, J.-S. Hu and L.-J. Wan, *Adv. Funct. Mater.*, 2022,  
435 **32**, 2107479.
- 436 36. W. Song, K. Xie, J. Wang, Y. Guo, C. He and L. Fu, *Phys. Chem. Chem. Phys.*, 2021, **23**,  
437 10418-10428.
- 438 37. D. Chen, Z. Chen, X. Zhang, Z. Lu, S. Xiao, B. Xiao and C. V. Singh, *J. Energy Chem.*,  
439 2021, **52**, 155-162.
- 440 38. S. Jiao, X. Fu and H. Huang, *Adv. Funct. Mater.*, 2021, **32**, 2107651.
- 441 39. Z. Pu, I. S. Amiin, Z. Kou, W. Li and S. Mu, *Angew. Chem. Int. Ed.*, 2017, **56**, 11559-  
442 11564.
- 443 40. A. Hirsch and F. Hauke, *Angew. Chem. Int. Ed.*, 2018, **57**, 4338-4354.
- 444 41. B. Jiang, Z. Tang, F. Liao, H. Lin, S. Lu, Y. Li and M. Shao, *J. Mater. Chem. A*, 2017, **5**,  
445 21903-21908.
- 446 42. Y. Li and D. Y. Li, *J. Appl. Phys.*, 2004, **95**, 7961-7965.
- 447 43. D. Dai, L. Wang, N. Xiao, S. Li, H. Xu, S. Liu, B. Xu, D. Lv, Y. Gao, W. Song, L. Ge and J.  
448 Liu, *Appl. Catal. B: Environ.*, 2018, **233**, 194-201.
- 449 44. R. K. Khisamov, I. M. Safarov, R. R. Mulyukov and Y. M. Yumaguzin, *Phys. Solid State*,

450 2013, **55**, 1-4.

451 45. J. Li, Y. Tan, M. Zhang, W. Gou, S. Zhang, Y. Ma, J. Hu and Y. Qu, *ACS Energy Lett.*,

452 2022, **7**, 1330-1337.

453
